# Supplementary material
Source: publisher figshare collection journal article supplement (https://acs.figshare.com/ndownloader/files/4282665)
Supplement: Supplementary file 1 [file 4282665]

# Supporting information

**Bright luminescent silica nanoparticles for two-photon microscopy imaging via controlled formation of 4,4'-diethylaminostyryl-2,2'-bipyridine Zn(II) surface complexes.**

Nuria Rendón, Adrien Bourdolle, Patrice L. Baldeck, Hubert Le Bozec, Chantal Andraud, Sophie Brasselet,\* Christophe Copéret,\* Olivier Maury\*

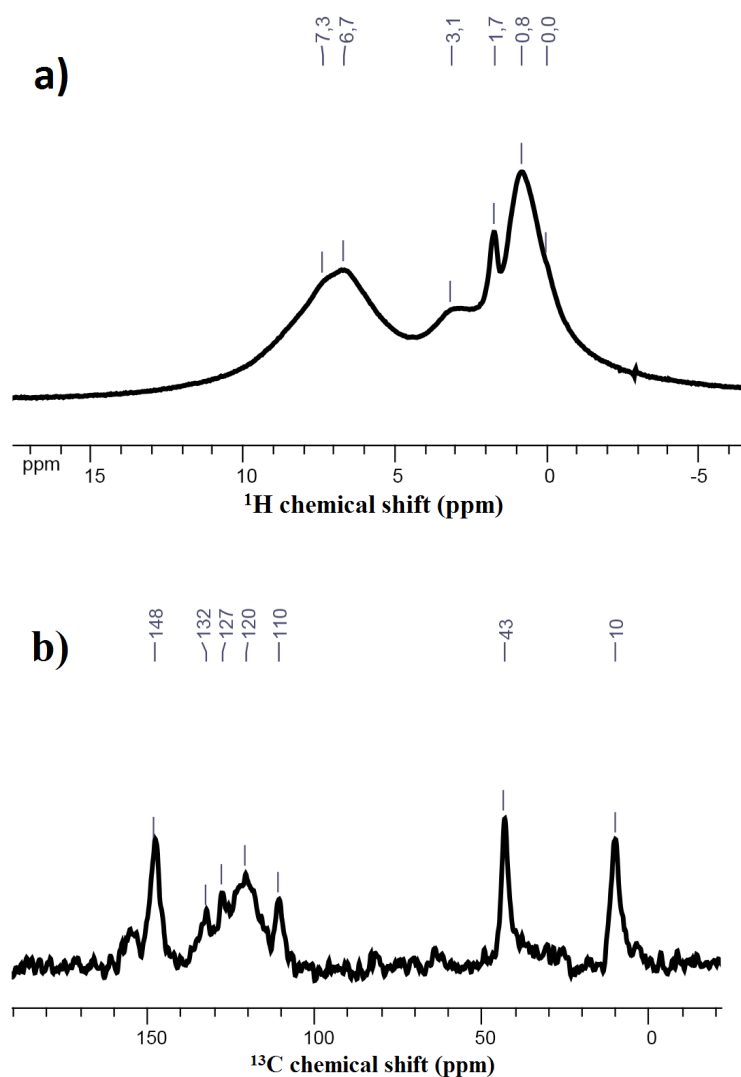

**Figure S1.** (a) One-dimensional proton single pulse solid-state spectrum recorded under MAS frequency of 10 kHz: 8 scans were recorded at a recycle rate of 4 s. (b)  $^{13}\text{C}$  CP MAS solid state NMR spectra (right) of **[DEAS-bipy/SiO<sub>2</sub>]** recorded under MAS frequency of 10 kHz. 14500 scans were recorded at a recycle rate of 2 s and a CP time of 2 ms.

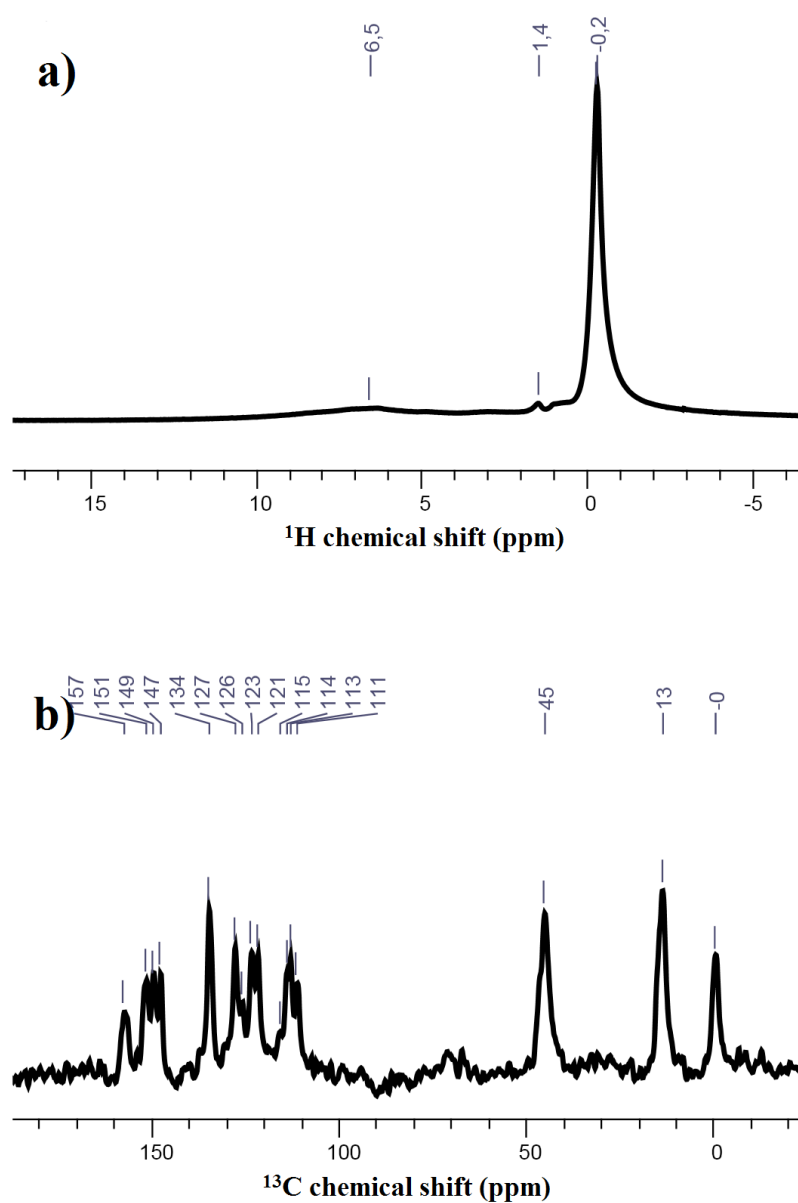

**Figure S2.** (a) One-dimensional proton single pulse solid-state spectrum of **[DEAS-bipy/Passivated\_SiO<sub>2</sub>]** recorded under MAS frequency of 10 kHz: 8 scans were recorded at a recycle rate of 4 s. (b)  $^{13}\text{C}$  CP MAS solid-state NMR spectrum of **[DEAS-bipy/Passivated\_SiO<sub>2</sub>]** recorded under MAS frequency of 10 kHz, 6500 scans were recorded at a recycle rate of 2 s and a CP time of 2 ms.
